# Supplementary material for: Impact of Using Different Levels of Threshold-Based Artefact Correction on the Quantification of Heart Rate Variability in Three Independent Human Cohorts
Source: PubMed Central journal article supplement (PMC7074236; doi:10.3390/jcm9020325), 2020-01-23
Supplement: jcm-09-00325-s001.pdf [file jcm-09-00325-s001.pdf]

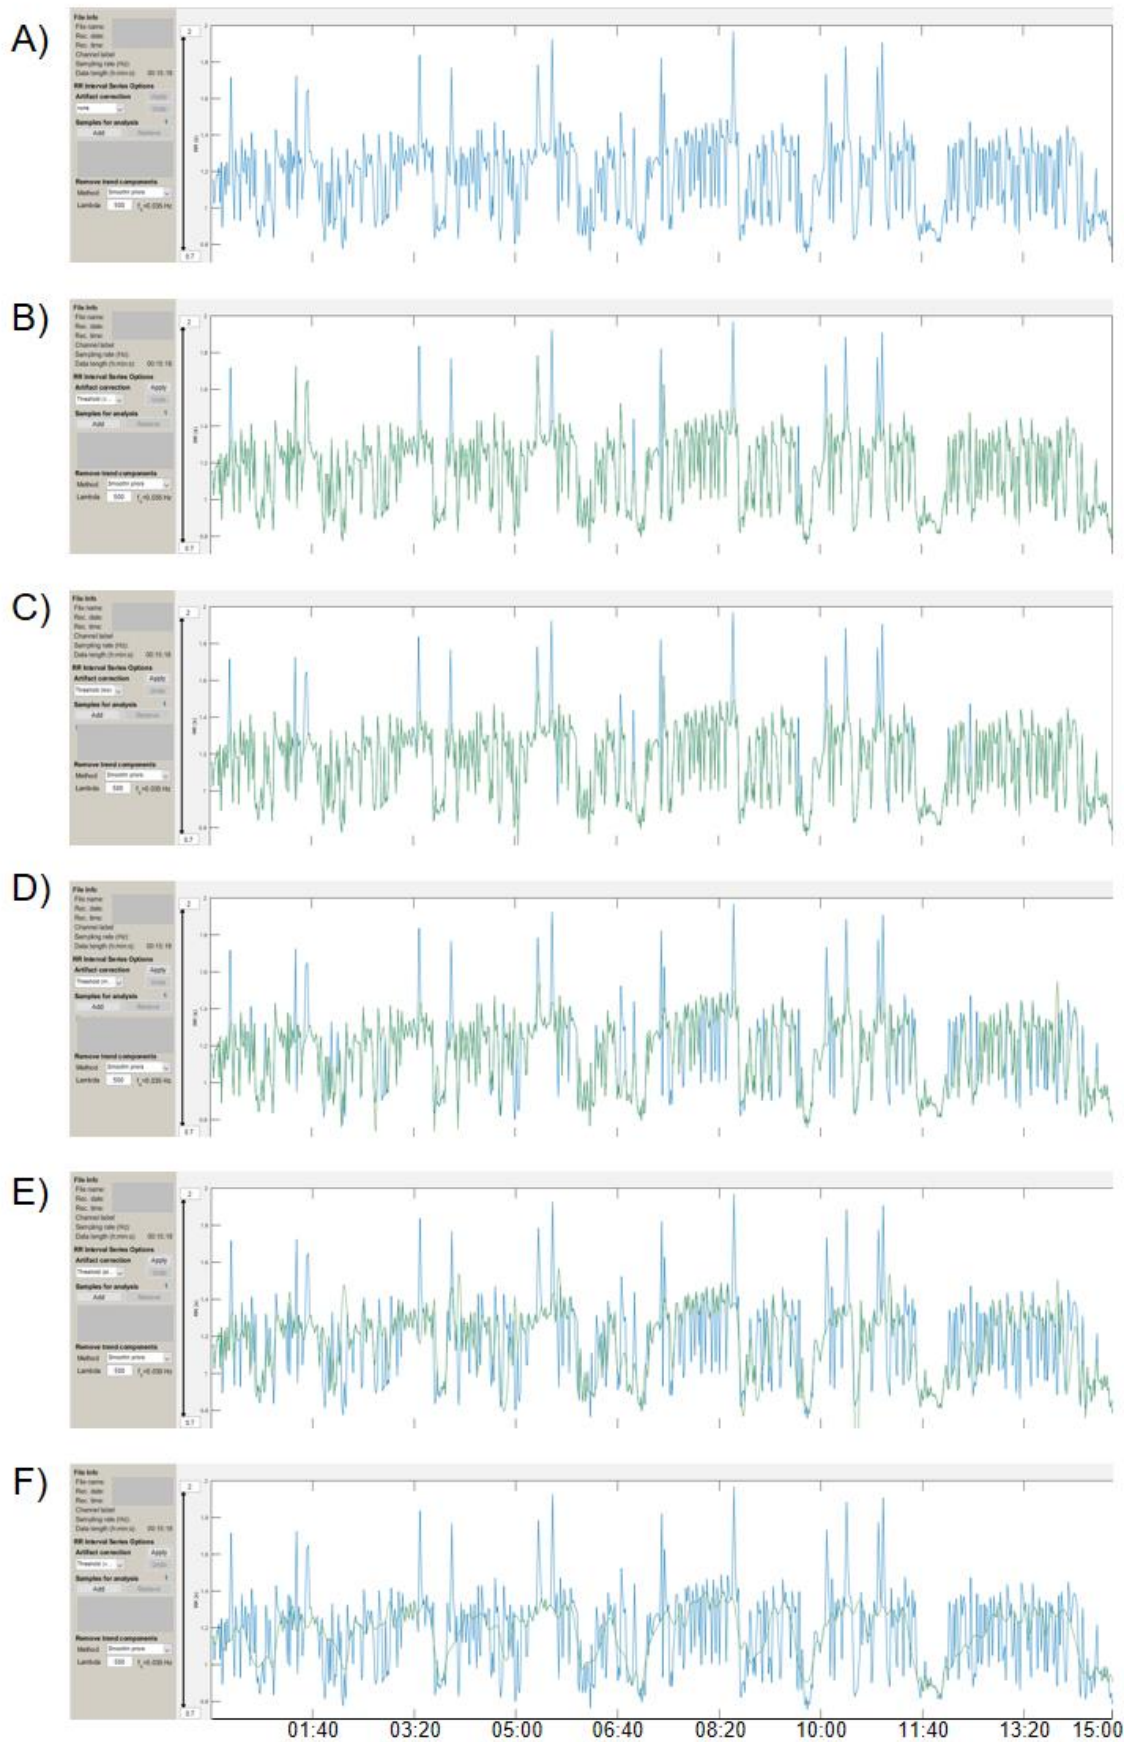

**Figure S1.** Example of a visual inspection of a R-R signal to find possible artifacts or premature contractions across Kubios filters (Panel A: None Filter; Panel B: Very Low Filter; Panel C: Low

Filter; Panel D: Medium Filter; Panel E: Strong Filter; and Panel F: Very Strong Filter). Green line represents the R-R signal before using a Kubios filter. Blue line (except when using the None Filter; Panel A) represent the excluded R-R signal after using the specific Kubios Filter.

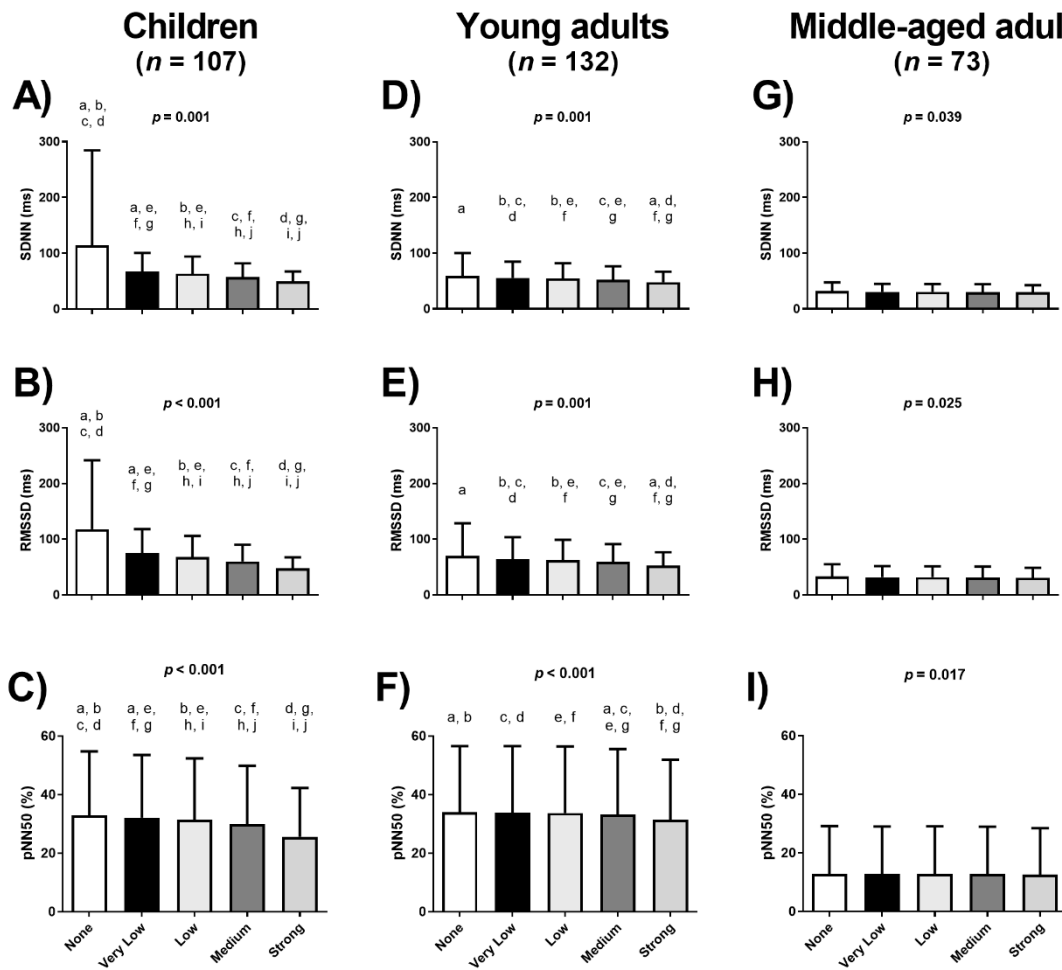

**Figure S2.** Differences on the Heart Rate Variability (HRV) time-domain parameters using different Kubios filters (excluding the Very Strong filter) in three different cohorts. Data are represented as mean and standard deviation. SDNN: standard deviation of all normal R-R intervals (Panels A, D and G); RMSSD: squared root of the mean of the sum of the squares of successive normal R-R interval differences (Panels B, E and H); pNN50: number of pairs of adjacent normal R-R intervals differing by more than 50ms in the entire recording (Panels C, F and I);  $p$  value from the ANOVA comparisons; similar letters means Bonferroni post-hoc differences.

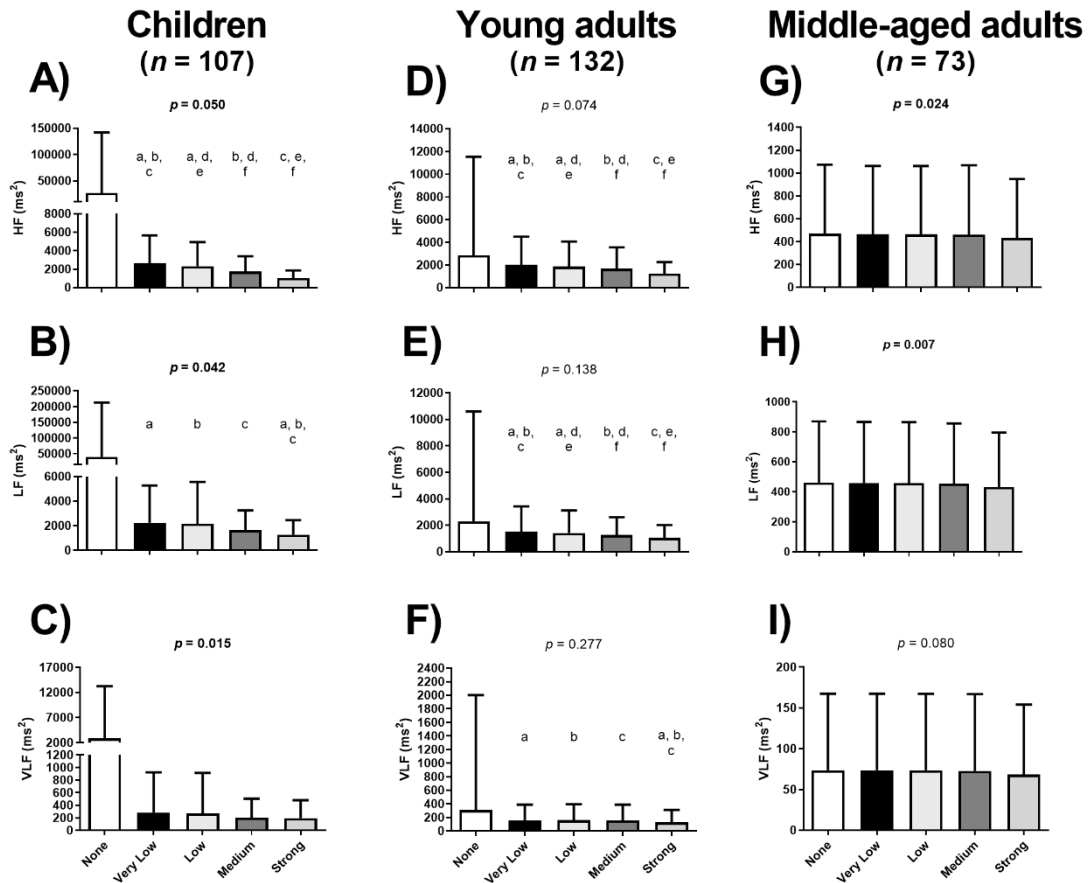

**Figure S3.** Differences on the Heart Rate Variability (HRV) frequency-domain parameters using different Kubios filter (excluding the Very Strong filter) in three different cohorts. Data are represented as mean and standard deviation. HF: power in the high frequency (in absolute units, ms<sup>2</sup>; Panels A, E, and I); LF: power in the low frequency (in absolute units, ms<sup>2</sup>; Panels B, F, and J); LF/HF: ratio of the power in the low frequency divided by the power in the high frequency (Panels C, G, and K); VLF: power in the very low frequency (in absolute units, ms<sup>2</sup>; Panels D, H, and L).  $p$  value from the ANOVA comparisons; similar letters means Bonferroni post-hoc differences.

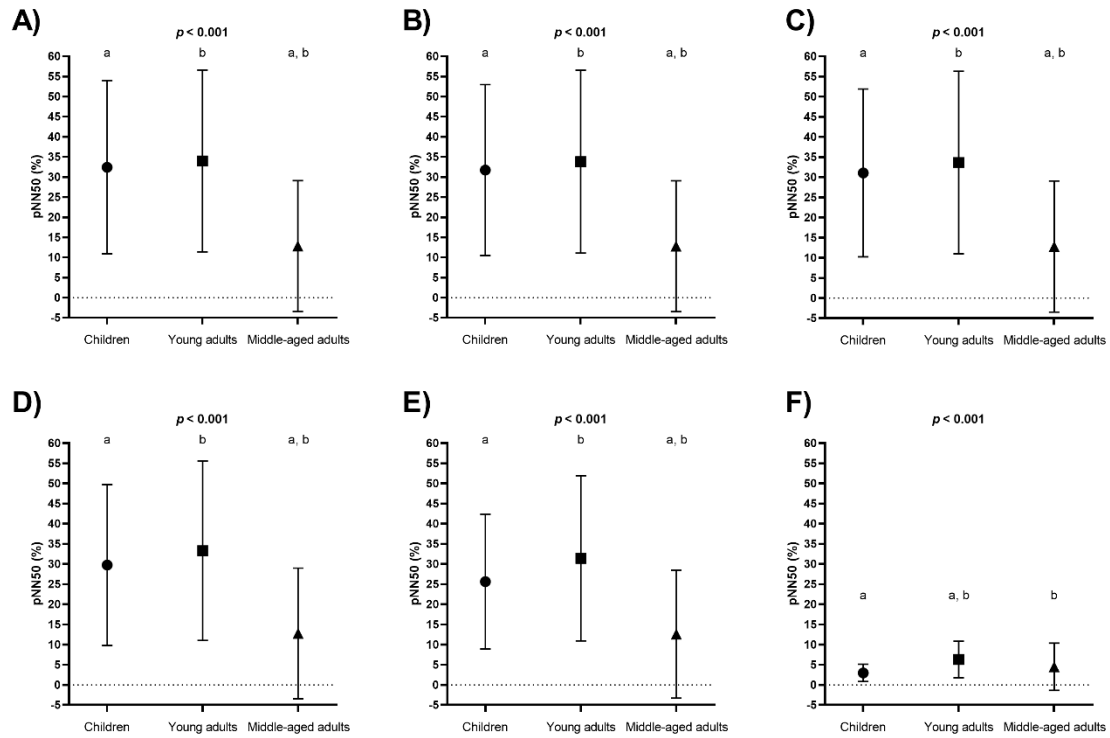

**Figure S4.** Differences between cohorts on the SDNN (standard deviation of all normal R-R intervals) using different Kubios filters (Panel A: None Filter; Panel B: Very Low Filter; Panel C: Low Filter; Panel D: Medium Filter; Panel E: Strong Filter; and Panel F: Very Strong Filter). Data are represented as mean and standard deviation of non-normalized SDNN; the results of SDNN after logarithmic normalization were similar.  $p$  value from the ANOVA comparisons; similar letters means Bonferroni *post-hoc* differences.

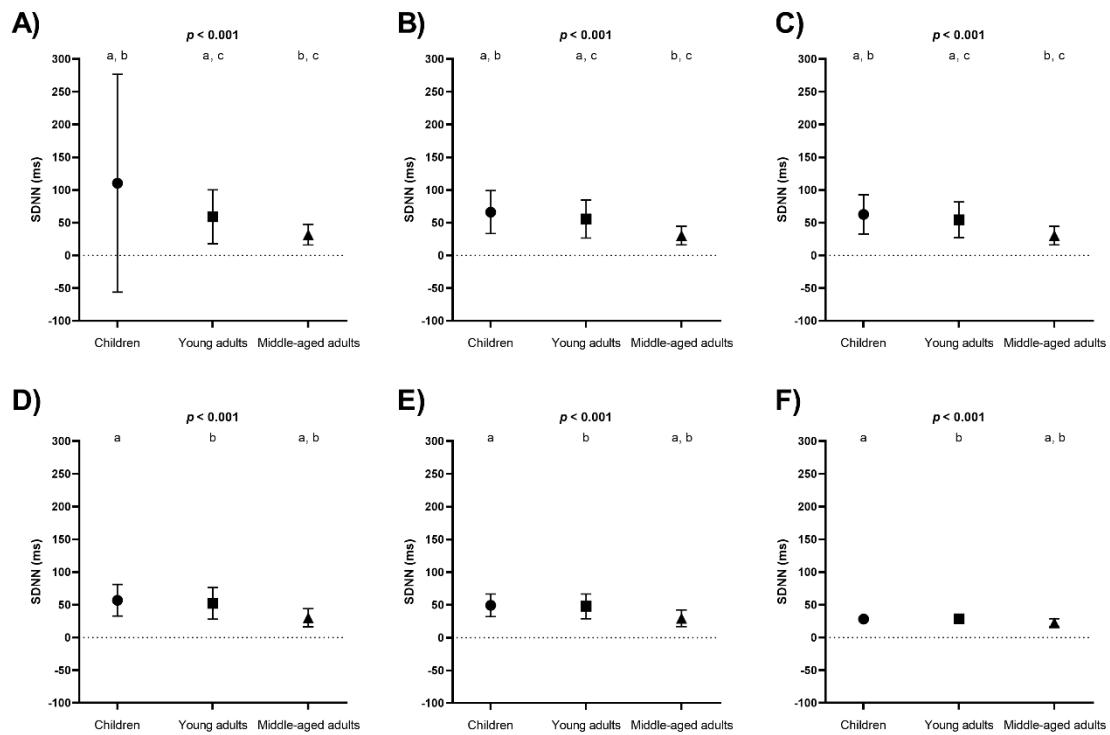

**Figure S5.** Differences between cohorts on the pNN50 (number of pairs of adjacent normal R-R intervals differing by more than 50ms in the entire recording) using different Kubios filters (Panel A: None Filter; Panel B: Very Low Filter; Panel C: Low Filter; Panel D: Medium Filter; Panel E: Strong Filter; and Panel F: Very Strong Filter). Data are represented as mean and standard deviation of non-normalized pNN50; the results of pNN50 after logarithmic normalization were similar.  $p$  value from the ANOVA comparisons; similar letters means Bonferroni *post-hoc* differences.

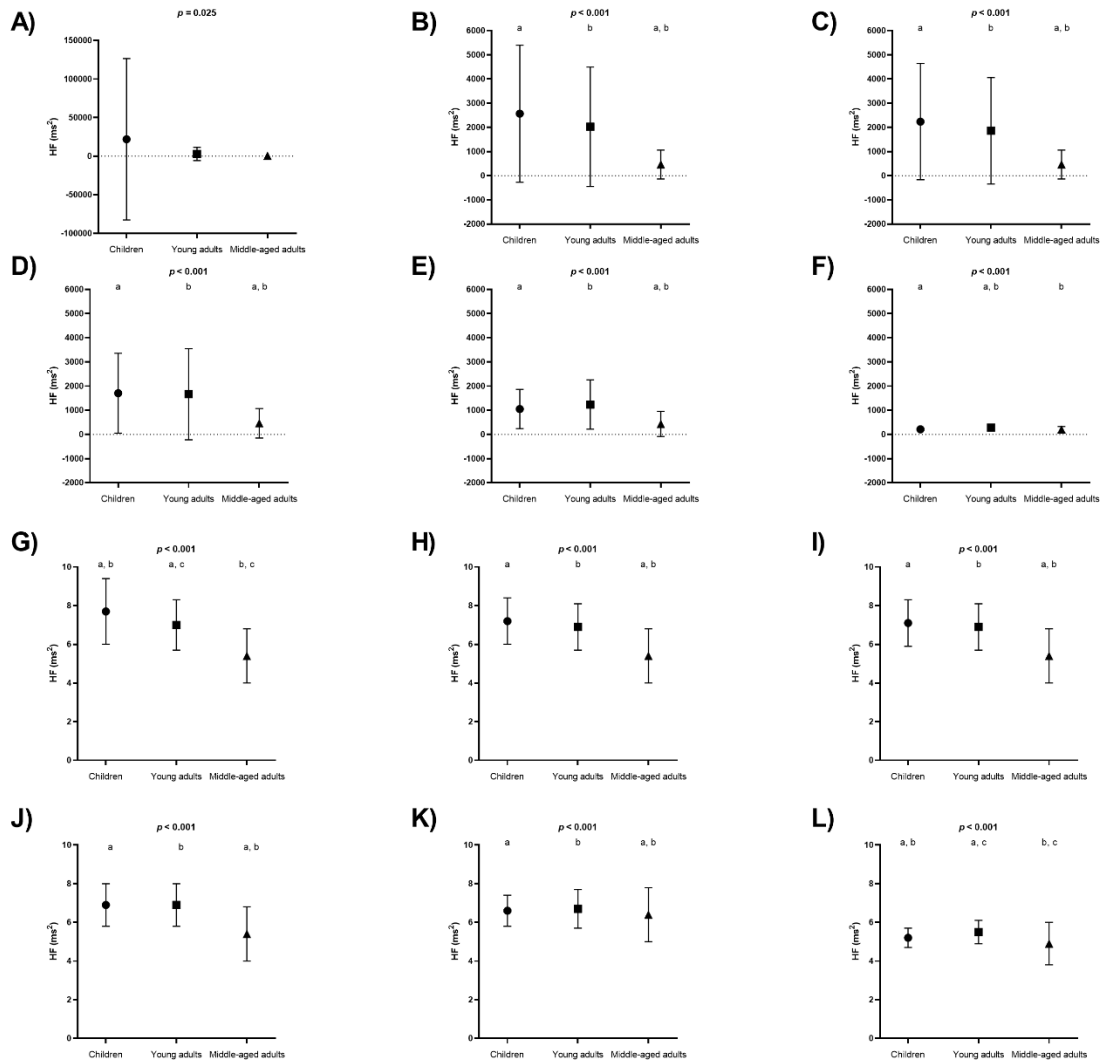

**Figure S6.** Differences between cohorts on the HF: power in the high frequency (in absolute units, ms<sup>2</sup>) using different Kubios filters. Data are represented as mean and standard deviation of non-normalized HF (Panels A to F; Panel A: None Filter; Panel B: Very Low Filter; Panel C: Low Filter; Panel D: Medium Filter; Panel E: Strong Filter; and Panel F: Very Strong Filter); and after logarithmic normalization (Panels G to L; Panel G: None Filter; Panel H: Very Low Filter; Panel I: Low Filter; Panel J: Medium Filter; Panel K: Strong Filter; and Panel L: Very Strong Filter).  $p$  value from the ANOVA comparisons; similar letters means Bonferroni *post-hoc* differences.
